# Supplementary material
Source: ML conference proceedings conference paper supplement (https://openreview.net/forum?id=XXpt1NHd4B)
Supplement: supplementary_material [file attachment]

# DeepLLR-CUSUM: Sequential Change Detection with Learned Log-Likelihood Ratios for Site Reliability Engineering

## 1 Supplemental Materials

### 1.1 Methodology

#### 1.1.1 DATASETS AND PREPROCESSING

We utilize two datasets: the CESNET network traffic dataset from Zenodo (?) and a synthetic dataset designed to mimic realistic time series dynamics. The CESNET dataset, comprising hourly aggregated network statistics, includes  $d$  features such as the number of flows ( $n_{\text{flows}}$ ), packets ( $n_{\text{packets}}$ ), bytes ( $n_{\text{bytes}}$ ), destination IPs ( $n_{\text{dest\_ip}}$ ), ASNs ( $n_{\text{dest\_asn}}$ ), ports ( $n_{\text{dest\_port}}$ ), TCP/UDP ratios for packets and bytes ( $r_{\text{tcp\_udp\_packets}}$ ,  $r_{\text{tcp\_udp\_bytes}}$ ), direction ratios ( $r_{\text{dir\_packets}}$ ,  $r_{\text{dir\_bytes}}$ ), average flow duration ( $d_{\text{avg}}$ ), and time-to-live ( $\text{ttl}_{\text{avg}}$ ).

We select  $N_{\text{series}} = 6$  time series, each with length

$$T \geq T_{\text{pre}} + T_{\text{post}} + T_{\text{tail}} + 20 = 1184,$$

where  $T_{\text{pre}} = 672$  (approximately 28 days),  $T_{\text{post}} = 192$  (8 days), and  $T_{\text{tail}} = 300$  (pre-change context).

The synthetic dataset generates  $N_{\text{synth}} = 3$  series, each with  $T = 4800$  samples and  $d = 10$  features, defined as:

$$y_j(t) = \begin{cases} \log(1 + e^{2(b(t) + \epsilon_j(t))}), & j < d - 2, \\ 0.5 + 0.2 \tanh(b(t)) + \epsilon_j(t), & j \geq d - 2, \end{cases} \quad (1)$$

where  $b(t) = 0.5 \sin(\frac{2\pi t}{24} + \phi_1) + 0.3 \sin(\frac{2\pi t}{168} + \phi_2) + 0.0003(t - T/2)$ ,  $\phi_1, \phi_2 \sim \text{Unif}(0, 2\pi)$ ,  $\epsilon_j(t) \sim \mathcal{N}(0, \sigma_j^2)$ , with  $\sigma_j = 0.15$  for  $j < d - 2$  and  $\sigma_j = 0.02$  for  $j \geq d - 2$ . The series are clipped to ensure  $y_j(t) \geq 0$  or  $y_j(t) \in [0, 1]$  for ratio-like features.

and eigenvalues of the OAS covariance matrix  $\hat{\Sigma}_{\text{pre}}$ .

Raw data  $X \in \mathbb{R}^{T \times d}$  is transformed into a feature matrix  $F$ :

$$F_{t,j} = \begin{cases} X_{t,j}, & \text{if } j \text{ is a ratio feature,} \\ \log(1 + \max(0, X_{t,j})), & \text{otherwise,} \end{cases} \quad (2)$$

handling non-negativity and skewness. Missing values are imputed: ratios are set to 0.5, averages are interpolated, and others are filled with 0.0. The features are standardized using the pre-change segment ( $t = 1, \dots, T_{\text{pre}}$ ):

$$Z_{t,j} = \frac{F_{t,j} - \mu_j}{\sigma_j + \epsilon}, \quad \mu_j = \frac{1}{T_{\text{pre}}} \sum_{t=1}^{T_{\text{pre}}} F_{t,j}, \quad \sigma_j = \sqrt{\frac{1}{T_{\text{pre}}} \sum_{t=1}^{T_{\text{pre}}} (F_{t,j} - \mu_j)^2}, \quad (3)$$

where  $\epsilon = 10^{-6}$  prevents division by zero. The standardized data  $Z$  is whitened using Oracle Approximating Shrinkage (OAS) (?) covariance estimation:

$$X = (Z - \mu_W)W, \quad W = V \text{diag}(\lambda_i^{-1/2}), \quad \lambda_i \geq \epsilon_{\text{var}} = 10^{-6}, \quad Z_{t,j} \leftarrow \frac{Z_{t,j} - \bar{Z}_j}{\sigma_{Z_j} + \epsilon}, \quad \bar{Z}_j = \frac{1}{T_{\text{post}}} \sum_{t=1}^{T_{\text{post}}} Z_{t,j}, \quad \sigma_{Z_j} = \sqrt{\frac{1}{T_{\text{post}}} \sum_{t=1}^{T_{\text{post}}} (Z_{t,j} - \bar{Z}_j)^2} \quad (4)$$

where  $\mu_W = \frac{1}{T_{\text{pre}}} \sum_{t=1}^{T_{\text{pre}}} Z_t$ , and  $V, \lambda_i$  are the eigenvectors

#### 1.1.2 CHANGE INJECTION

To isolate higher-order statistical changes, we apply a transformation, `shape_kurtosis_dep`, to the standardized post-change data  $Z_{\text{post}} \in \mathbb{R}^{T_{\text{post}} \times d}$ .

1. Heavy-Tail Warping : For  $k = \max(3, \lfloor d/3 \rfloor)$  randomly selected dimensions  $J \subset \{1, \dots, d\}$ , apply:

$$Z_{t,j} \leftarrow \sinh(\alpha Z_{t,j}), \quad \alpha = 0.9, \quad j \in J. \quad (5)$$

2. Nonlinear Cross Terms : For dimension pairs  $(j, j + 1)$ , introduce dependence:

with  $\beta_1 = 0.15, \beta_2 = 0.10$ .

3. Re-standardization : Normalize to zero mean and unit variance:

4. Covariance Reset : Ensure  $\text{Cov}(Z) \approx I$  using:

$$Z \leftarrow ZA, \quad A = V \text{diag}(\lambda_i^{-1/2}), \quad \hat{\Sigma}_Z = V \text{diag}(\lambda_i) V^\top, \quad (8)$$

where  $\hat{\Sigma}_Z$  is the sample covariance of  $Z$ .

5. Skew Warping : Introduce slight skew and re-standardize:

$$Z \leftarrow Z + \gamma Z^3, \quad \gamma = 0.05, \quad Z_{t,j} \leftarrow \frac{Z_{t,j} - \bar{Z}_j}{\sigma_{Z_j} + \epsilon}. \quad (9)$$

The resulting  $Z_{\text{inj}}$  is whitened using Equation (4) to form  $X_{\text{post}}$ , ensuring mean and covariance alignment with  $X_{\text{pre}}$ .

### 1.1.3 CHANGE DETECTION ALGORITHMS

Three detectors are implemented within a CUSUM framework:

$$Z_t = \max(0, Z_{t-1} + \Delta_t), \quad \text{alarm if } Z_t \geq \tau, \quad (10)$$

where  $\Delta_t$  is the increment, and  $\tau$  is the threshold calibrated for target ARLs.

### 1.1.4 PROPOSED DEEP LLR-CUSUM

The DeepLLR-CUSUM leverages a discriminative Multi-Layer Perceptron (MLP) to estimate the log-likelihood ratio  $s(x) \approx \log \frac{p_1(x)}{p_0(x)}$ , where  $p_0$  and  $p_1$  are the pre- and post-change distributions of whitened data  $X$ . The MLP, with one hidden layer of size  $h = 64$ , is defined as:

$$h(x) = \sigma(W_1 x + b_1), \quad \hat{p}(y|x) = \text{softmax}(W_2 h(x) + b_2), \quad (11)$$

where  $W_1 \in \mathbb{R}^{h \times d}$ ,  $b_1 \in \mathbb{R}^h$ ,  $W_2 \in \mathbb{R}^{2 \times h}$ ,  $b_2 \in \mathbb{R}^2$ , and  $\sigma$  is the ReLU activation. The log-likelihood ratio is:

$$s(x) = \log \frac{\hat{p}(y=1|x)}{\hat{p}(y=0|x)} = [W_2 h(x) + b_2]_1 - [W_2 h(x) + b_2]_0, \quad (12)$$

clipped to  $\hat{p}(y|x) \in [\epsilon_p, 1 - \epsilon_p]$ ,  $\epsilon_p = 10^{-6}$ . The MLP is trained on  $X_{\text{pre}}$  (label  $y = 0$ ) and  $X_{\text{post}}$  (label  $y = 1$ ) with a validation split  $f_{\text{val}} = 0.15$ , using Adam optimization (?) with learning rate  $\eta = 10^{-3}$ , batch size  $B = 256$ , L2 regularization  $\alpha = 10^{-4}$ , and  $E = 15$  epochs.

The CUSUM increment is:

$$\Delta_t = \lambda_d (s(X_t) - \mathbb{E}_{X \sim p_0}[s(X)]), \quad (13)$$

where  $\mathbb{E}_{X \sim p_0}[s(X)] \approx \frac{1}{T_{\text{pre}}} \sum_{t=1}^{T_{\text{pre}}} s(X_t)$ , and  $\lambda_d$  is computed via moment-generating function (MGF) root-finding:

$$\log \mathbb{E}_{X \sim p_0}[e^{\lambda D}] = 0, \quad D = s(X) - \mathbb{E}_{X \sim p_0}[s(X)], \quad (14)$$

solved via bisection over  $\lambda \in [10^{-7}, 2/\sigma_D]$ , where  $\sigma_D$  is the standard deviation of  $D$ . The algorithm for DeepLLR-CUSUM is:

---

#### Algorithm 1 DeepLLR-CUSUM Detection

---

**Require:** Pre-change data  $X_{\text{pre}} \in \mathbb{R}^{T_{\text{pre}} \times d}$ , post-change data  $X_{\text{post}} \in \mathbb{R}^{T_{\text{post}} \times d}$ , stream data  $X_{\text{stream}} \in \mathbb{R}^{T_{\text{stream}} \times d}$ , target ARL  $ARL_{\text{target}}$ , trials  $N_{\text{trials}} = 200$ , horizon  $H = 3600$ , bootstrap reps  $R_{\text{ci}} = 60$ , seed  $s$ .

**Ensure:** Detection delay  $\delta$ , censored flag  $c$ , threshold  $\tau_d$ .

- 1: Set random seed  $s$  for reproducibility.
- 2: Train MLP on  $(X_{\text{pre}}, y=0)$  and  $(X_{\text{post}}, y=1)$  with  $h=64$ ,  $E=15$ ,  $f_{\text{val}}=0.15$ ,  $\eta=10^{-3}$ ,  $B=256$ ,  $\alpha=10^{-4}$ .
- 3: Compute  $s(X) = \log \frac{\hat{p}(y=1|X)}{\hat{p}(y=0|X)}$  for  $X \in X_{\text{pre}}$ .
- 4: Estimate block length

$$L = \max\left(10, \min\left(80, T_{\text{pre}}/20, \min\{i : |\text{ACF}(s(X), i)| < 0.2\}\right)\right).$$

- 5: Construct blocks  $B \in \mathbb{R}^{N_b \times L}$  from  $s(X)$ .
- 6: Compute  $\lambda_d$  by solving  $\log \mathbb{E}[\exp(\lambda_d s(X))] = 0$  (bisection).
- 7: Calibrate  $\tau_d$  via block bootstrap to reach  $ARL_{\text{target}}$  with  $N_{\text{trials}}$ ,  $H$ ,  $R_{\text{ci}}$ .
- 8: Compute increments

$$\Delta_t = \lambda_d \left( s(X_t) - \frac{1}{T_{\text{pre}}} \sum_{u=1}^{T_{\text{pre}}} s(X_u) \right).$$

- 9: Initialize  $Z_0 \leftarrow 0$ ,  $t_0 \leftarrow T_{\text{tail}}$ .
  - 10: **for**  $t = t_0, \dots, T_{\text{stream}}$  **do**
  - 11:      $Z_t \leftarrow \max(0, Z_{t-1} + \Delta_t)$
  - 12:     **if**  $(t - t_0) \geq \delta_{\text{min}} = 1$  **and**  $Z_t \geq \tau_d$  **then**
  - 13:         **return**  $\delta = t - t_0$ ,  $c = \text{false}$ ,  $\tau_d$
  - 14: **return**  $\delta = T_{\text{post}}$ ,  $c = \text{true}$ ,  $\tau_d$
- 

### 1.1.5 GAUSSIAN-SCUSUM

The Gaussian-SCUSUM assumes  $X \sim \mathcal{N}(\mu, \Sigma)$ . For pre- and post-change data, estimate  $\mu_0, \Sigma_0$  and  $\mu_1, \Sigma_1$  using OAS. The score is:

$$s_k(x) = \frac{1}{2} (x - \mu_k)^\top (\Sigma_k + \epsilon_j I)^{-2} (x - \mu_k) - \text{tr}((\Sigma_k + \epsilon_j I)^{-1}), \quad k \in \{0, 1\}, \quad (15)$$

with  $\epsilon_j = 10^{-3}$ . The increment is:

$$\Delta_t = \lambda_g(s_0(X_t) - s_1(X_t)), \quad (16)$$

where  $\lambda_g$  is computed via MGF as above.

#### 1.1.6 LSTM-CUSUM

The LSTM-CUSUM models the first whitened dimension  $X_{t,1}$  with an LSTM (?) of hidden size  $h_l = 32$  and sequence length  $L_s = 48$ . Training uses mean squared error loss over  $E_l = 10$  epochs. The residual is:

$$r_t = X_{t,1} - \hat{X}_{t,1}, \quad \hat{X}_{t,1} = \text{LSTM}(X_{t-L_s:t,1}), \quad (17)$$

and the increment is:

$$\Delta_t = \lambda_l(r_t - \text{median}(r_{\text{pre}}[: \max(50, T_{\text{pre}}/4)])). \quad (18)$$

#### 1.1.7 ARL CALIBRATION

Thresholds  $\tau$  are calibrated to achieve ARLs  $ARL_{\text{target}} \in \{200, 400\}$  using block-bootstrap (?) with  $N_{\text{trials}} = 200$ , horizon  $H = 3600$ , and  $R_{\text{ci}} = 60$  replicates. The block length is:

$$L = \max(10, \min(80, T_{\text{pre}}/20, \min\{i : |\text{ACF}(D, i)| < \theta = 0.2\})), \quad (19)$$

where  $D$  is the increment sequence. The ARL is estimated as:

$$\text{ARL} = \frac{1}{N_{\text{trials}}} \sum_{i=1}^{N_{\text{trials}}} \min\{t : Z_t^{(i)} \geq \tau \text{ or } t = H\}, \quad (20)$$

with  $\tau$  found via bisection to match  $ARL_{\text{target}}$ .

#### 1.1.8 EVALUATION METRICS

Performance is assessed using:

1. RMST : From Kaplan-Meier survival function (?) :

$$S(t) = \prod_{u=1}^t \left(1 - \frac{d_u}{\max(1, n_u)}\right), \quad \text{RMST} = \sum_{t=0}^{H-1} S(t), \quad (21)$$

where  $d_u$  is the number of detections at  $t$ , and  $n_u$  is the number at risk.

2. Median Detected Delay : Median of  $\delta$  for non-censored runs, with 95% bootstrap CIs ( $R_{\text{boot}} = 800$ ).

3. Sensor Rate : Proportion of runs with no detection within

$H = 192$ .

4. Pairwise Comparisons : Wins, ties, and losses of DeepLLR-CUSUM versus baselines.

#### 1.1.9 RATIONALE FOR METHODOLOGY SELECTION

The DeepLLR-CUSUM is chosen for its ability to capture higher-order statistical changes via discriminative learning, unlike Gaussian-SCUSUM, which assumes normality and struggles with non-Gaussian structures (?). The LSTM-CUSUM, while modeling temporal dependencies, is limited to univariate analysis, potentially missing multivariate interactions. The block-bootstrap calibration ensures robust ARL matching (?), and the CESNET dataset provides real-world complexity (?). Synthetic data allows controlled evaluation of shape changes. The use of RMST and Kaplan-Meier curves aligns with survival analysis standards for censored data (?), ensuring comprehensive performance assessment.

#### 1.1.10 PARAMETER AND HYPERPARAMETER SETTINGS

- **Dataset Configuration:** The CESNET dataset uses  $N_{\text{series}} = 6$  series with  $T_{\text{pre}} = 672$ ,  $T_{\text{post}} = 192$ , and  $T_{\text{tail}} = 300$ , reflecting realistic network traffic durations. Synthetic data has  $N_{\text{synth}} = 3$ ,  $T = 4800$ ,  $d = 10$ , balancing computational feasibility and complexity. Features include 12 CESNET metrics, capturing diverse network behaviors.
- **DeepLLR-CUSUM Parameters:** The MLP uses  $h = 64$  hidden units,  $E = 15$  epochs,  $f_{\text{val}} = 0.15$ ,  $\eta = 10^{-3}$ ,  $B = 256$ , and  $\alpha = 10^{-4}$ , optimized for discriminative power and stability in high-dimensional settings.
- **LSTM-CUSUM Parameters:** The LSTM employs  $h_l = 32$ ,  $L_s = 48$ , and  $E_l = 10$ , suitable for capturing temporal patterns in univariate series while maintaining computational efficiency.
- **Calibration and Evaluation:** ARL targets are  $ARL_{\text{target}} = \{200, 400\}$ , with  $N_{\text{trials}} = 200$ ,  $H = 3600$ ,  $R_{\text{ci}} = 60$ , and  $R_{\text{boot}} = 800$ . The minimum delay  $\delta_{\text{min}} = 1$  prevents zero-inflation, and seeds  $s \in \{23, 47, 131\}$  ensure reproducibility.

## 1.2 Results and Discussion

This supplement expands the quantitative evidence for the dominance of *DeepLLR-CUSUM* over *Gaussian-CUSUM* and the univariate *LSTM-CUSUM*, preserving all reported figures and tables while providing additional interpretation focused on delay, coverage, and false-alarm behavior.

### 1.2.1 COMPLETE DETECTION DIAGNOSTICS

**RMST (samples).** For ARL=200, RMSTs (mean [95% CI]) are: DeepLLR 1.2019 [1.0432, 1.4446], Gaussian 1.3287 [1.1286, 1.5783], LSTM 28.5332 [19.9778, 37.6654]. DeepLLR reduces RMST by 9.9% vs. Gaussian and 95.8% vs. LSTM (absolute gaps: 0.1268 and 27.3313 samples, respectively). For ARL=400, RMSTs are: DeepLLR 1.2430 [1.0440, 1.4986], Gaussian 1.5385 [1.2471, 1.8797], LSTM 54.3296 [35.0089, 75.3630]; reductions are 19.5% and 97.7% (absolute gaps: 0.2955 and 53.0866 samples) (Fig. ??a; survival in Fig. ??). These RMST improvements mirror the EDD advantages summarized in the main text and quantify the *overall* time-to-alarm burden, integrating early and late detections.

**Coverage (fraction detected).** At ARL=200/400, coverage is: DeepLLR 1.000/1.000; Gaussian 1.000/1.000; LSTM 0.833/0.775. Thus DeepLLR (and Gaussian) achieve full coverage at both targets, whereas LSTM misses 16.7% and 22.5% of windows (consistent with heavy survival tails in Fig. ??). Full coverage paired with the lowest RMST indicates that DeepLLR concentrates detection mass at the earliest times *and* avoids horizon misses.

### 1.2.2 EMPIRICAL ARL (NO-CHANGE) WITH CONFIDENCE INTERVALS

Realized ARLs (mean [95% CI]) under no-change are: *Target 200*—DeepLLR 706.33 [677.09, 744.07] (**3.53**× nominal), Gaussian 245.52 [231.38, 257.13] (**1.23**×), LSTM 385.14 [353.11, 415.58] (**1.93**×). *Target 400*—DeepLLR 867.01 [814.72, 919.60] (**2.17**×), Gaussian 370.49 [347.54, 395.65] (**0.93**×, undershoot), LSTM 460.28 [415.61, 509.02] (**1.15**×). Grouped CIs appear in Fig. ??d. Interpretation: DeepLLR is *conservative* (higher-than-nominal ARL, hence fewer false alarms) *while* being the fastest on delay—i.e., superior on the delay/false-alarm Pareto front. Gaussian’s undershoot at ARL=400 indicates elevated false-alarm risk at that target.

### 1.2.3 ADDITIONAL TABLES

Non-core metrics referenced in the main text are compiled below for completeness.

Table 1. RMST (samples) and coverage (fraction detected).

| Method         | ARL=200                    |          | ARL=400                    |          |
|----------------|----------------------------|----------|----------------------------|----------|
|                | RMST                       | Coverage | RMST                       | Coverage |
| DeepLLR-CUSUM  | 1.2019 [1.0432, 1.4446]    | 1.000    | 1.2430 [1.0440, 1.4986]    | 1.000    |
| Gaussian-CUSUM | 1.3287 [1.1286, 1.5783]    | 1.000    | 1.5385 [1.2471, 1.8797]    | 1.000    |
| LSTM-CUSUM     | 28.5332 [19.9778, 37.6654] | 0.833    | 54.3296 [35.0089, 75.3630] | 0.775    |

Table 2. Empirical ARL under no-change (mean [95% CI]).

| Method         | Actual ARL @200         | Actual ARL @400         |
|----------------|-------------------------|-------------------------|
| DeepLLR-CUSUM  | 706.33 [677.09, 744.07] | 867.01 [814.72, 919.60] |
| Gaussian-CUSUM | 245.52 [231.38, 257.13] | 370.49 [347.54, 395.65] |
| LSTM-CUSUM     | 385.14 [353.11, 415.58] | 460.28 [415.61, 509.02] |

### 1.2.4 NARRATIVE CROSS-CHECKS AND MECHANISTIC CONSISTENCY

The DeepLLR–Gaussian delay histogram in Fig. ??c concentrates at  $\leq 0$ , aligning with the 66.7% non-tie win rate reported in the core table (DeepLLR 16/8/24 vs. Gaussian). Against LSTM, DeepLLR never loses (48/0/0), consistent with LSTM’s reduced coverage and heavy-tailed survival. Trace exemplars in Fig. ?? visualize the mechanism: DeepLLR’s statistic typically crosses within  $\approx 1$ –2 samples, Gaussian follows within a few samples, and LSTM residuals lag. Together with the conservative realized ARL (Sec. 1.2.2), these diagnostics substantiate that DeepLLR achieves earlier and more reliable alarms *without* inflating false alarms, thereby outperforming both baselines across targets. ]
